# Supplementary material for: Cloning of PmMYB6 in Pinus massoniana and an Analysis of Its Function
Source: MDPI journal article supplement (doi:10.3390/ijms241813766), 2023-09-06
Supplement: s1 [file s1]

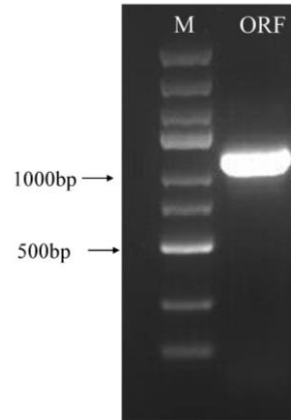

**Figure S1.** Cloning of the open reading frame of *PmMYB6*. M: NormalRun™ 250 bp-II DNA ladder; ORF: Open reading frame for *PmMYB6*.

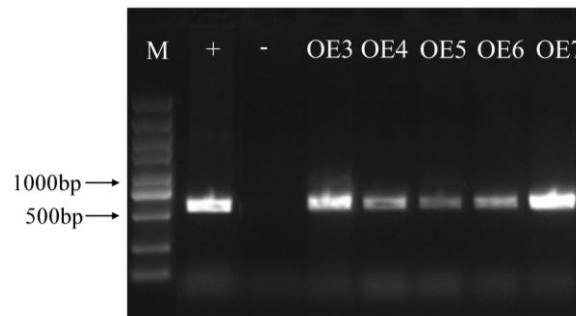

**Figure S2.** PCR assay for overexpression of *PmMYB6* tobacco. M: DL5000 Plus DNA Marker; +: Positive control. -: Wild type (Negative control); OE3-OE7: Transgenic strains.

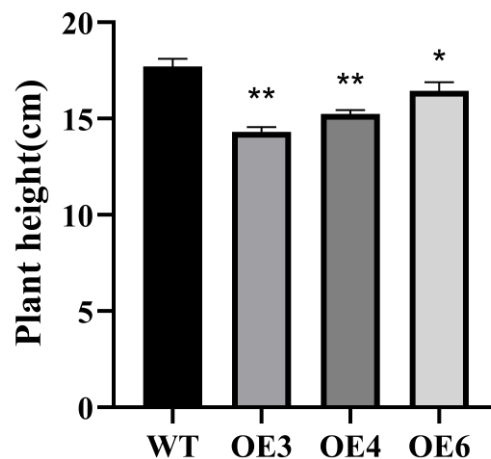

**Figure S3.** Wild-type and transgenic tobacco plant height. WT: Wild type. OE3, OE4 and OE6: Transgenic strains. \*: The mean performances of the transgenes were significantly different from those of the wild type ( $p < 0.05$ ). \*\*: Mean performance of the transgenes was extremely significantly different from that of the wild type ( $p < 0.01$ ).

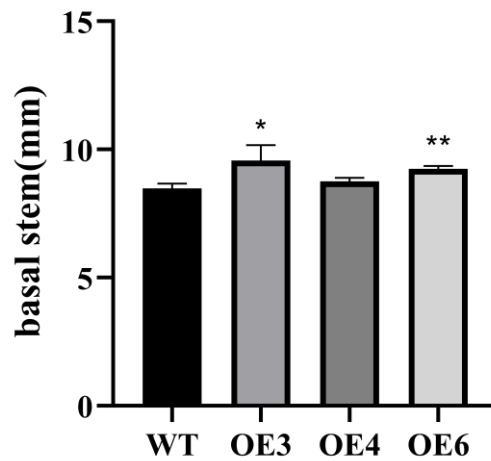

**Figure S4.** Wild-type and transgenic tobacco basal stem. WT: Wild type. OE3, OE4 and OE6: Transgenic strains. \*: The mean performances of the transgenes were significantly different from those of the wild type ( $p<0.05$ ). \*\*: Mean performance of the transgenes was extremely significantly different from that of the wild type ( $p<0.01$ ).

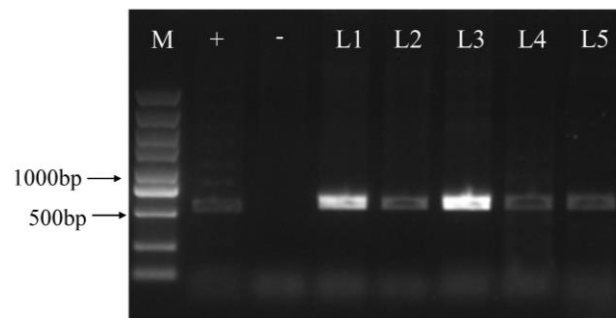

**Figure S5.** PCR assay for overexpression of *PmMYB6* poplar. M: DL5000 Plus DNA Marker; +: Positive control. -: Wild type (Negative control); L1-L5: Transgenic strains.

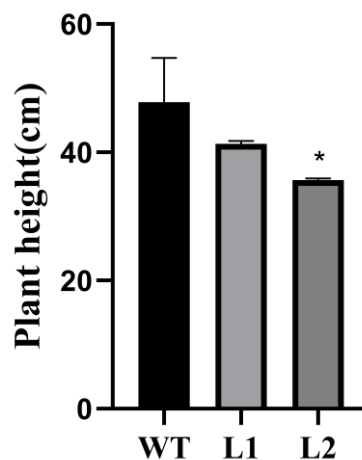

**Figure S6.** Wild-type and transgenic poplar plant height. WT: Wild type. L1, L2: Transgenic strains. \*: The mean performances of the transgenes were significantly

different from those of the wild type ( $p<0.05$ ).

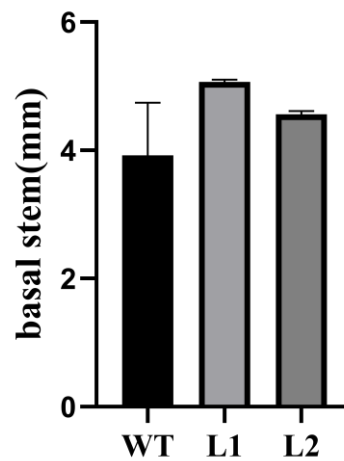

**Figure S7.** Wild-type and transgenic poplar basal stems. WT: Wild type. L1, L2: Transgenic strains.

**Table S1.** Primer sequences used in this study.

| Primer_ID | PCR primer                                    |
|-----------|-----------------------------------------------|
| PmMYB6-F  | ATGGGTAGATCTCCTTGCTGC                         |
| PmMYB6-R  | TTATATTTGTACATGGTCTTCC                        |
| N1216-F   | acgggggactctagaggatccATGGGTAGATCTCCTTGCTGCTC  |
| N1216-R   | cgatcggggaaattcgagctcTATTTGTACATGGTCTTCCAGGGC |
| Check-F   | GGCGATGGTGGATGGAG                             |
| Check-R   | AACAGTCAGACGGGGAAGC                           |
| N1216-Q-F | GACTTCTACAATAACGCACAGGATG                     |
| N1216-Q-R | TAGACCTTTCCTCCCATTCATCTTC                     |
| 18S-F     | ACACGGGGAGGTAGTGACAA                          |
| 18S-R     | CCTCCAATGGATCCTCGTTA                          |
| qPAL1-F   | CCATCCAGGTCAAATTGAGGCTGCT                     |
| qPAL1-R   | ACTTCTTAGCTGCCTTCATGTAAGCT                    |
| qPAL2-F   | CCTAGAAGCCATCACCAAGTTGCTC                     |
| qPAL2-R   | GTTTCTCCATTGGGTCCCACG                         |
| qPAL3-F   | CATCCAGGTCAAATTGAGGCTGCA                      |
| qPAL3-R   | ACTTCTTAGCTGCCTTCATGTAAGC                     |
| qPAL5-F   | GAGATGCTGGAAGCTATCACCAAGC                     |
| qPAL5-R   | GGCTCTCCATTGGGTCCAAC                          |
| qC4H2-F   | GAAATGTGCAATTGATCATATTTTG                     |
| qC4H2-R   | ATTGCAGCAACATTGATGTTCTCC                      |
| q4CL3-F   | ACTAGCCCATCCAGAGATATCCGA                      |

|             |                             |
|-------------|-----------------------------|
| q4CL3-R     | TCATCTTCGGTGGCCTGAGACTTT    |
| q4CL5-F     | GTGATCATGCTCATCCTGCCAAGT    |
| q4CL5-R     | TTGGCAGCAGTAGTAATGGCACCT    |
| qPAL1-F     | TACAAGTTTGTGAGGGAGGAG       |
| qPAL1-R     | GAACGTAGAAGGGATTGGA AAC     |
| qCHI1-F     | GTCACCTTKCTGCTAAATGGAAGGG   |
| qCHI1-R     | GCCAATCATTGACTCTAGCACAGC    |
| qDFR2-F     | GTGCYGTGGARACATGCAGAGAAA    |
| qDFR2-R     | GCCTTGCACTACAAGCATGGTACA    |
| qFLS1-F     | CCACRGTRRCYAAARATARGRC AA   |
| qFLS1-R     | CAATACATCAGGGCAACCAACATCTC  |
| qANS1-F     | GGTGACACTRTTGAGATCTTGAGC    |
| qANS1-R     | CCATTTCAACGACATASCTTGATMGCC |
| qLAR3-F     | CCTCCAAGCAATCTGCTAAGCACT    |
| qLAR3-R     | TCATGGTGCCATTCTTGTTTCGCTG   |
| qUFGT1-F    | ATGTCCGATCATGTAGCAGTC       |
| qUFGT1-R    | ACCATCCCACACTTCGTATG        |
| qHCT1-F     | ATCAGCATGTAAGGCACGCGG       |
| qHCT1-R     | TGCCAAAGTAACCAGGTGGAAGCGT   |
| qHCT6-F     | AGATCAACATGCAAAGCACGTGA     |
| qHCT6-R     | GCCAAAGTAACCAGGAGGGAGTTG    |
| qC3H3-F     | GTATGACCTTAGTGAAGACACAATCAT |
| qC3H3-R     | CCCTTGGGTTCTTGATTAGCTC      |
| qCCoAOMT1-F | CAGTAATTCAGAAAGCTGGTGTTGC   |
| qCCoAOMT1-R | GCATCCACAAAGATGAAATCAAAAC   |
| qCCoAOMT2-F | CCTTCCAACGCCAGGAAAGAGAGTA   |
| qCCoAOMT2-R | GTGGCCAACCTTCTTGATGCCTTCGG  |

---

**Table S2.** Gene name and GenBank ID in this study.

| Gene name | GenBank ID         |
|-----------|--------------------|
| PtrMYB003 | Potri.001G267300.1 |
| PtrMYB008 | Potri.001G075400.1 |
| PtrMYB009 | Potri.001G086700.1 |
| PtrMYB004 | Potri.001G347200.1 |
| PtrMYB115 | Potri.002G173900.1 |
| PtrMYB123 | Potri.003G144200.1 |
| PtrMYB153 | Potri.003G144300.1 |
| PtrMYB126 | Potri.003G219900.1 |
| PtrMYB014 | Potri.004G115600.1 |
| PtrMYB051 | Potri.013G056500.1 |
| PtrMYB052 | Potri.013G067000.1 |
| PtrMYB183 | Potri.006G221500.1 |
| PtrMYB134 | Potri.006G221800.1 |
| PtrMYB020 | Potri.009G061500.1 |
| PtrMYB118 | Potri.017G125600.1 |
| PtrMYB120 | Potri.017G125700.1 |
| PtrMYB119 | Potri.017G125800.1 |
| PtrMYB117 | Potri.017G125900.1 |
| PtrMYB113 | Potri.017G126000.1 |
| PtrMYB086 | Potri.018G049600.1 |
| PtrMYB060 | Potri.019G036300.1 |
| PtrMYB061 | Potri.019G036400.1 |
| PtMYB6    | AQW79622.1         |
| VvMYB6    | QIE07153.1         |
| VvMYB5a   | AFG28177.1         |
| VvMYB5b   | AAX51291.1         |
